# Supplementary material
Source: MDPI journal article supplement (https://www.mdpi.com/2071-1050/15/4/3605)
Supplement: s1 [file s1]

### Supplementary file

Table S1: Fish diversity of fish with catch (number of individuals and total weight in kilogram) in three consecutive years.

| Order          | Family      | Species                                                 | Common name              | Local name    | Catch (Percentage) |         |       |         |       |         |
|----------------|-------------|---------------------------------------------------------|--------------------------|---------------|--------------------|---------|-------|---------|-------|---------|
|                |             |                                                         |                          |               | 2019               |         | 2020  |         | 2021  |         |
|                |             |                                                         |                          |               | Nos                | Wt (kg) | Nos   | Wt (kg) | Nos   | Wt (kg) |
| Anabantiformes | Anabantidae | <i>Anabas cobojius</i> (Hamilton, 1822)                 | Gangetic koi             | Kalo koi      | 0.22               | 2.85    | 0.22  | 3.17    | 0.16  | 2.51    |
|                | Anabantidae | <i>Anabas testudineus</i> (Hamilton, 1822)              | Climbing perch           | Koi           | 0.24               | 4.5     | 0.28  | 5.07    | 0.22  | 3.65    |
|                | Channidae   | <i>Channa marulius</i> (Hamilton, 1822)                 | Giant snakehead          | Gajar         | 0.01               | 3.78    | 0.05  | 3.3     | 0.01  | 3.43    |
|                |             | <i>Channa orientalis</i> (Bloch & Schneider, 1801)      | Walking snakehead        | Gachua        | 0.02               | 0.14    | 0.05  | 0.04    | 0.02  | 0.21    |
|                |             | <i>Channa striata</i> (Bloch, 1793)                     | Striped snakehead        | Shol          | 0.05               | 5.1     | 0.04  | 4.13    | 0.07  | 5.82    |
|                |             | <i>Channa punctata</i> (Bloch, 1793)                    | Spotted snakehead        | Taki          | 0.74               | 7.94    | 0.64  | 7.48    | 0.63  | 6.91    |
| cypriniformes  | Cyprinidae  | <i>Amblypharyngodon mola</i> (Hamilton, 1822)           | Mola carplet             | Mola          | 13.5               | 7.09    | 16.83 | 6.67    | 16.35 | 5.69    |
|                |             | <i>Osteobrama cotio</i> (Hamilton, 1822)                | Cotio                    | Dhela         | 0.47               | 0.46    | 0.26  | 0.29    | 0.79  | 0.66    |
|                |             | <i>Catla catla</i> (Hamilton, 1822)                     | Catla                    | Catla         | 0.003              | 3.1     | 0.002 | 1.71    | 0.003 | 2.78    |
|                |             | <i>Ctenopharyngodon idella</i> (Valenciennes, 1844)     | Grass carp               | Grass carp    | 0.002              | 0.65    | 0.001 | 0.23    | 0.001 | 0.38    |
|                |             | <i>Cyprinus carpio</i> (Linnaeus, 1758)                 | Common carp              | Carpu         | 0.11               | 5.1     | 0.11  | 4.65    | 0.09  | 4.88    |
|                |             | <i>Labeo boggut</i> (Sykes, 1839)                       | Boggut labeo             | Nunia         | 0                  | 0       | 0     | 0       | 0.01  | 0.16    |
|                |             | <i>Labeo calbasu</i> (Day, 1878)                        | Kalbasu                  | Kalibaus      | 0.08               | 1.66    | 0.07  | 1.71    | 0.01  | 1.72    |
|                |             | <i>Puntius sophore</i> (Hamilton, 1822)                 | Spot-fin swamp barb      | Jat Puti      | 3.26               | 1.83    | 3.41  | 2.3     | 3.36  | 1.64    |
|                |             | <i>Pethia ticto</i> (Hamilton, 1822)                    | Ticto barb               | Tit Puti      | 3.2                | 2.07    | 2.55  | 1.89    | 2.91  | 1.93    |
|                |             | <i>Salmostoma acinaces</i> (Valenciennes, 1844)         | Silver razorbelly minnow | Chela         | 0.05               | 0.14    | 0.04  | 0.12    | 0.07  | 0.21    |
|                |             | <i>Labeo gonius</i> (Hamilton, 1822)                    | Kuria labeo              | Gonia         | 0.002              | 0.3     | 0.002 | 0.3     | 0.002 | 0.35    |
|                |             | <i>Cirrhinus cirrhosus</i> (Bloch, 1795)                | Mrigal                   | Mrigal        | 0.005              | 0.58    | 0.005 | 0.62    | 0.005 | 0.61    |
|                |             | <i>Esomus danricus</i> (Hamilton, 1822)                 | Flying barb              | Darkina       | 0.6                | 0.15    | 0.54  | 0.16    | 0.63  | 0.16    |
|                |             | <i>Rasbora daniconius</i> (Hamilton, 1822)              | Slender rasbora          | Angjani       | 0                  | 0       | 0     | 0       | 0.03  | 0.01    |
|                |             | <i>Devario devario</i> (Hamilton, 1822)                 | Sind Danio               | Chapchela     | 0.06               | 0.03    | 0     | 0       | 0.21  | 0.09    |
|                |             | <i>Puntius sarana</i> (Hamilton, 1822)                  | Olive barb               | Sarputi       | 0.01               | 0.26    | 0.01  | 0.32    | 0.01  | 0.31    |
|                |             | <i>Puntius chola</i> (Hamilton, 1822)                   | Swamp barb               | Chala punti   | 1.06               | 2       | 1.14  | 2.38    | 0.99  | 1.88    |
|                |             | <i>Barbonymus gonionotus</i> (Bleeker, 1850)            | Java barb                | Thai Puti     | 0.01               | 0.16    | 0.01  | 0.12    | 0.01  | 0.19    |
|                |             | <i>Hypophthalmichthys molitrix</i> (Valenciennes, 1844) | Silver carp              | Silver carp   | 0.004              | 0.9     | 0.004 | 0.5     | 0.005 | 0.46    |
|                |             | <i>Salmostoma bacaila</i> (Hamilton, 1822)              | Large razorbelly minnow  | Narkeli chela | 0.47               | 0.33    | 0.44  | 0.36    | 0.63  | 0.44    |
|                |             | <i>Hypophthalmichthys nobilis</i>                       | Bighead carp             | Bighead       | 0.002              | 0.37    | 0.003 | 0.46    | 0.003 | 0.51    |

|                    |                  |                                                         |                           |             |        |      |       |      |        |      |
|--------------------|------------------|---------------------------------------------------------|---------------------------|-------------|--------|------|-------|------|--------|------|
|                    |                  | (Richardson, 1845)                                      |                           | carp        |        |      |       |      |        |      |
|                    |                  | <i>Labeo bata</i> (Hamilton, 1822)                      | Bata labeo                | Bata        | 0.03   | 0.42 | 0.02  | 0.32 | 0.03   | 0.45 |
|                    |                  | <i>Labeo rohita</i> (Hamilton, 1822)                    | Rohu                      | Rui         | 0.02   | 3.93 | 0.02  | 4.56 | 0.03   | 4.16 |
|                    | Cobitidae        | <i>Lepidocephalichthys guntea</i> (Hamilton, 1822)      | Guntea loach              | Gutum       | 0.66   | 0.58 | 0.7   | 0.68 | 0.64   | 0.63 |
|                    |                  | <i>Lepidocephalichthys annandalei</i> (Chaudhuri, 1912) | Annaldale loach           | Gutum       | 0.37   | 0.78 | 0.26  | 0.7  | 0.36   | 0.93 |
|                    |                  | <i>Canthophrys gongota</i> (Hamilton, 1822)             | Gongota loach             | Gang Gutam  | 0.03   | 0.08 | 0.03  | 0.1  | 0.04   | 0.11 |
|                    |                  | <i>Botia dario</i> (Hamilton, 1822)                     | Bengal loach              | Rani        | 0      | 0    | 0     | 0    | 0.07   | 0.05 |
| Cyprinodontiformes | Aplocheilidae    | <i>Aplocheilus panchax</i> (Hamilton, 1822)             | Top-minnows               | Kanpona     | 0.55   | 0.14 | 0.31  | 0.1  | 0.78   | 0.21 |
| Gobiiformes        | Gobiidae         | <i>Glossogobius giuris</i> (Hamilton, 1822)             | Tank goby                 | Bele        | 1.01   | 3.24 | 0.91  | 3.23 | 0.87   | 2.75 |
| Clupeiformes       | Clupeidae        | <i>Goniolosa manmina</i> (Hamilton, 1822)               | Ganges river gizzard shad | Chapila     | 3.77   | 5.1  | 4.52  | 6.73 | 4.22   | 5.12 |
|                    |                  | <i>Corica soborna</i> (Hamilton, 1822)                  | Ganges river sprat        | Kaski       | 53.09  | 4.84 | 51.12 | 5.9  | 45.98  | 4.45 |
| Tetraodontiformes  | Tetraodontidae   | <i>Tetraodon cutcutia</i> (Hamilton, 1822)              | Ocellated pufferfish      | Potka       | 0.05   | 0.07 | 0.05  | 0.09 | 0.08   | 0.17 |
| Siluriformes       | Heteropneustidae | <i>Heteropneustes fossilis</i> (Bloch, 1794)            | Stinging Catfish          | Shing       | 1.25   | 7.35 | 1.29  | 7.51 | 1.72   | 8.71 |
|                    | Bagridae         | <i>Mystus vittatus</i> (Bloch, 1794)                    | Striped Dwarf Catfish     | Gulsa       | 0.03   | 0.36 | 0.03  | 0.38 | 0.04   | 0.43 |
|                    |                  | <i>Mystus tengara</i> (Hamilton, 1822)                  | Tengara mystus            | Tengara     | 1.22   | 2.96 | 1.14  | 3.15 | 1.17   | 2.82 |
|                    |                  | <i>Chandramara chandramara</i> (Hamilton, 1822)         | Asian cory                | Gura tengra | 0      | 0    | 0     | 0    | 0.04   | 0.02 |
|                    |                  | <i>Sperata aor</i> (Hamilton, 1822)                     | Long-whiskered catfish    | Ayre        | 0.004  | 0.83 | 0.003 | 0.95 | 0.004  | 0.93 |
|                    |                  | <i>Rita rita</i> (Hamilton, 1822)                       | Rita                      | Rita        | 0      | 0    | 0     | 0    | 0.003  | 0.06 |
|                    | Siluridae        | <i>Ompok pabda</i> (Hamilton, 1822)                     | Pabdah Catfish            | pabda       | 0.01   | 0.08 | 0     | 0    | 0.02   | 0.22 |
|                    |                  | <i>Wallago attu</i> (Bloch & Schneider, 1801)           | Boal                      | Boal        | 0.003  | 1.2  | 0.002 | 1.31 | 0.002  | 1.48 |
|                    | Pangasiidae      | <i>Pangasius pangasius</i> (Hamilton, 1822)             | Pangas Catfish            | Pangas      | 0.0002 | 0.14 | 0     | 0    | 0.0005 | 0.42 |
|                    | Schilbeidae      | <i>Pseudeutropius atherinoides</i> (Bloch, 1794)        | Indian potasi             | Batasi      | 0.06   | 0.09 | 0     | 0    | 0.16   | 0.19 |
|                    | Clariidae        | <i>Clarias batrachus</i> (Linnaeus, 1758)               | Walking catfish           | Magur       | 0.02   | 0.41 | 0.02  | 0.45 | 0.03   | 0.49 |
|                    | Ailiidae         | <i>Ailia coila</i> (Hamilton, 1822)                     | Gangetic ailia            | Kajuli      | 0.17   | 0.12 | 0.18  | 0.13 | 0.33   | 0.26 |
|                    |                  | <i>Clupisoma garua</i> (Hamilton, 1822)                 | Garua Bachcha             | Garua       | 0.01   | 0.12 | 0.07  | 0.1  | 0.01   | 0.23 |
| Synbranchiformes   | Mastacembelidae  | <i>Macrognathus aculeatus</i> (Smith, 1945)             | Spiny eel                 | Tara Baim   | 0.76   | 0.97 | 0.61  | 0.96 | 0.89   | 1.06 |
|                    |                  | <i>Macrognathus pancalus</i> (Hamilton, 1822)           | Striped Spiny Eel         | Guchi Baim  | 0.4    | 2.45 | 0.43  | 2.85 | 0.54   | 3.18 |
|                    |                  | <i>Mastacembelus armatus</i> (Lacepède, 1800)           | Zig-zag eel               | Baim        | 0.05   | 0.53 | 0.04  | 0.45 | 0.05   | 0.58 |
|                    | Synbranchidae    | <i>Monopterus cuchia</i> (Hamilton, 1822)               | Gangetic mud eel          | Cuchia      | 0.01   | 0.2  | 0     | 0    | 0.02   | 0.32 |

|                   |               |                                                         |                         |               |      |      |      |       |        |      |
|-------------------|---------------|---------------------------------------------------------|-------------------------|---------------|------|------|------|-------|--------|------|
| Perciformes       | Nandidae      | <i>Nandus nandus</i> (Hamilton, 1822)                   | Mud perch               | Meni          | 0.13 | 0.98 | 0.09 | 0.73  | 0.22   | 1.31 |
|                   | Anabantidae   | <i>Colisa lalius</i> (Hamilton, 1822)                   | Dwarf gourami           | Boicha        | 0.02 | 0.02 | 0    | 0     | 0.06   | 0.05 |
|                   |               | <i>Colisa fasciata</i> (Sterba, 1962)                   | Giant gourami           | Khailsa       | 3.02 | 6.34 | 2.44 | 6.11  | 2.44   | 5.73 |
|                   | Ambassidae    | <i>Ambassis apogonoides</i> (Bleeker, 1851)             | Highfin glassy perchlet | Lal Chanda    | 1.17 | 0.3  | 1.3  | 0.35  | 1.36   | 0.37 |
|                   | Osphronemidae | <i>Ctenops nobilis</i> (McClelland, 1845)               | Indian paradise fish    | Neftani       | 0.03 | 0.03 | 0    | 0     | 0.06   | 0.05 |
| Osteoglossiformes | Notopteridae  | <i>Notopterus notopterus</i> (Pallas, 1769)             | Bronze featherback      | Foli          | 0.01 | 0.24 | 0.01 | 0.21  | 0.02   | 0.45 |
| Cichliformes      | Cichlidae     | <i>Oreochromis mossambicus</i> (Peters, 1852)           | Mozambique Tilapia      | Tilapia       | 0.03 | 1.15 | 0.03 | 1.38  | 0.03   | 1.01 |
| Ovalentaria       | Ambassidae    | <i>Parambassis ranga</i> (Hamilton, 1822)               | Indian Glassy Fish      | Ranga Chanda  | 1.34 | 0.25 | 1.57 | 0.29  | 1.49   | 0.22 |
| Beloniformes      | Belonidae     | <i>Xenentodon cancila</i> (Hamilton, 1822)              | Freshwater garfish      | Kakila        | 0.03 | 0.38 | 0.01 | 0.21  | 0.07   | 0.55 |
| Anguilliformes    | Anguillidae   | <i>Anguilla bengalensis</i> (Gray, 1831)                | Indian mottled eel      | Bamosh        | 0    | 0    | 0    | 0     | 0.0002 | 0.06 |
| Decapoda          | Palaemonidae  | <i>Macrobrachium malcolmsonii</i> (Milne-Edwards, 1844) | Monsoon river prawn     | Chotka icha   | 2.16 | 0.25 | 1.47 | 0.201 | 4.54   | 0.54 |
|                   |               | <i>Macrobrachium lamarrei</i> (Milne-Edwards, 1837)     | Kuncho river prawn      | Gura Icha     | 4.14 | 0.82 | 4.65 | 1.07  | 4.06   | 0.78 |
|                   |               | <i>Macrobrachium rosenbergii</i> (de Man, 1879)         | Giant freshwater prawn  | Golda Chingri | 0.04 | 0.7  | 0.04 | 0.82  | 0.05   | 0.74 |
|                   |               | <i>Macrobrachium dolichodactylus</i> (Hilgendorf, 1879) | Ghoda River Prawn       | Ghoda Icha    | 0.13 | 0.06 | 0    | 0     | 0.26   | 0.12 |

Table S2: One-way ANOVA for fish catch (number) and fish catch (weight)

|                     |                | Sum of Squares   | df  | Mean Square    | F     | Sig.  |
|---------------------|----------------|------------------|-----|----------------|-------|-------|
| Fish catch (number) | Between Groups | 2348496474.464   | 2   | 1174248237.232 | 0.349 | 0.706 |
|                     | Within Groups  | 685976047088.145 | 204 | 3362627681.805 |       |       |
|                     | Total          | 688324543562.609 | 206 |                |       |       |
| Fish catch (weight) | Between Groups | 13033.673        | 2   | 6516.837       | 4.502 | 0.012 |
|                     | Within Groups  | 295325.893       | 204 | 1447.676       |       |       |
|                     | Total          | 308359.566       | 206 |                |       |       |

Table S3: One-way ANOVA (Tukey HSD) multiple comparisons for fish catch (number) and fish catch (weight).

| Dependent Variable | (I) Treatment | (J) Treatment | Mean Difference (I-J) | Std. Error | Sig. | 95% Confidence Interval |             |
|--------------------|---------------|---------------|-----------------------|------------|------|-------------------------|-------------|
|                    |               |               |                       |            |      | Lower Bound             | Upper Bound |
| Fish catch         | 2019          | 2020          | 2846.27536            | 9872.56142 | .955 | -20462.3324             | 26154.8831  |

|                        |      |      |             |            |      |             |            |
|------------------------|------|------|-------------|------------|------|-------------|------------|
| (number)               | 2020 | 2021 | -5283.44928 | 9872.56142 | .854 | -28592.0570 | 18025.1585 |
|                        |      | 2019 | -2846.27536 | 9872.56142 | .955 | -26154.8831 | 20462.3324 |
|                        |      | 2021 | -8129.72464 | 9872.56142 | .689 | -31438.3324 | 15178.8831 |
|                        | 2021 | 2019 | 5283.44928  | 9872.56142 | .854 | -18025.1585 | 28592.0570 |
|                        |      | 2020 | 8129.72464  | 9872.56142 | .689 | -15178.8831 | 31438.3324 |
|                        |      | 2020 | 8.39261     | 6.47778    | .399 | -6.9011     | 23.6863    |
| Fish catch<br>(weight) | 2020 | 2021 | -10.98638   | 6.47778    | .209 | -26.2801    | 4.3073     |
|                        |      | 2019 | -8.39261    | 6.47778    | .399 | -23.6863    | 6.9011     |
|                        |      | 2021 | -19.37899*  | 6.47778    | .009 | -34.6727    | -4.0853    |
|                        | 2021 | 2019 | 10.98638    | 6.47778    | .209 | -4.3073     | 26.2801    |
|                        |      | 2020 | 19.37899*   | 6.47778    | .009 | 4.0853      | 34.6727    |

\* The mean difference is significant at the 0.05 level.
